# Supplementary material for: The operation active sites of O2 reduction to H2O2 over ZnO
Source: Royal Society of Chemistry journal article supplement (doi:10.1039/d3ee01788e), 2023-01-01
Supplement: d3ee01788e1.pdf [file d3ee01788e1.pdf]

## Supplementary Information

### The operation active site of O<sub>2</sub> reduction to H<sub>2</sub>O<sub>2</sub> over ZnO

*Yunjie Zhou,<sup>a</sup> Liang Xu,<sup>a</sup> Jie Wu,<sup>a</sup> Wenxiang Zhu,<sup>a</sup> Tiwei He,<sup>a</sup> Hao Yang,<sup>a</sup> Hui Huang,<sup>a</sup> Tao Cheng,<sup>\* a</sup>*

*Yang Liu,<sup>\* a</sup> and Zhenhui Kang<sup>\* a, b</sup>*

<sup>a</sup> Institute of Functional Nano & Soft Materials (FUNSOM), Jiangsu Key Laboratory for Carbon-Based Functional Materials & Devices, Soochow University, Suzhou, 215123, Jiangsu, China.

<sup>b</sup> Macao Institute of Materials Science and Engineering (MIMSE), MUST–SUDA Joint Research Center for Advanced Functional Materials, Macau University of Science and Technology, Taipa 999078, Macao, China.

E-mail: [tcheng@suda.edu.cn](mailto:tcheng@suda.edu.cn), [yangl@suda.edu.cn](mailto:yangl@suda.edu.cn), [zhkang@suda.edu.cn](mailto:zhkang@suda.edu.cn)

## Supplementary Materials

Supplementary Text

Supplementary Figure 1 to 22

Supplementary Table 1 to 2

References

## Materials and Methods:

Zn(NO<sub>3</sub>)<sub>2</sub>·6H<sub>2</sub>O (99%) was purchased from Sigma-Aldrich; Urea (99.5 %) and K<sub>2</sub>SO<sub>4</sub> (99%) were purchased from Sinopharm Chemical Reagent Co. Ltd (China); H<sub>2</sub>O<sub>2</sub> (30%) was purchased from Yonghua Chemical Co., Ltd.; Nafion perfluorinated resin solution (5 wt %) was purchased from Adamas-Betas; Nafion 212 proton exchange membrane and Toray Carbon Paper (TGP-H-60) were purchased from Alfa Aesar. Milli-Q ultrapure water (Millipore, ≥18.2 MΩ cm<sup>-1</sup>) was used throughout the work.

## Pulse voltage-induced current (PVC)

According to S. Trasatti et al.<sup>1,2</sup>, the voltammetric charge depends on the potential sweep, and the sweep-rate dependence of  $q^*$  is to be related to the existence of less accessible surface. Extrapolation of  $q^*$  to  $v = 0$  provides  $q^*_T$ , the total charge proportional to the whole active surface. Conversely, extrapolation of  $q^*$  to  $v = \infty$  provides  $q^*_O$ , which is related to the ‘outer’ active surface.

The relationship between  $q^*$  and scan rate  $v$  has been found to be:

$$1/q^*(v) = q_T^* + k_1 v^{1/2}$$

And the relationship between  $q^*_O$  and scan rate has been found to be:

$$q^*(v) = q_O^* + k_2 v^{-1/2}$$

The interfacial capacitance ( $C$ ) can be been found to be:

$$C = \frac{\int_{E_2}^{E_1} |i| dE}{2v(E_2 - E_1)} = \frac{\int_{E_1}^{E_2} |i_a| dE + \int_{E_2}^{E_1} i_c dE}{2v(E_2 - E_1)}$$

$i_a$  and  $i_c$  are the instantaneous anodic and cathodic current, respectively,  $E_1$  and  $E_2$  are the cutoff potentials in the CVs.

The relationship between voltammetric charge and interfacial capacitance is:

$$q^*(v) = C(v) * (E_2 - E_1)$$

Similar to  $q^*_T$  and  $q^*_O$ , total capacitance  $C_T$  and outer capacitance  $C_O$  can be obtained by the following equations:

$$1/C(v) = 1/C_T + k_1' v^{1/2}$$

And:

$$C(\nu) = C_o + k_2 \nu^{-1/2}$$

## DFT Calculations.

### computational methods and models:

All calculations were carried out using the VASP (Vienna Ab-initio Simulation Package, VASP) software 5.4.4<sup>3-5</sup>, the exchange function was described by PBE (Perdew, Burke and Ernzerhof) functional parameterization of GGA (Generalized Gradient Approximation, GGA)<sup>6</sup> of DFT (Density of Functional Theory, DFT). What's more, these calculations took DFT-D3 correction for London disperse (van der Waals attraction) with Becke-Johnson damping into consideration<sup>7</sup>. And the PAW (Projector Augmented Wave) method was used to account for core-valence interactions<sup>8,9</sup>. The kinetic energy cutoff for plane wave expansions was set at 400 eV, and reciprocal space was sampled by the  $\Gamma$ -centered Monkhorst-Pack scheme with a grid of  $3 \times 3 \times 1$ . The convergence criteria are  $1 \times 10^{-5}$  eV energy differences for solving the electronic wave function. All atomic coordinates were converged to within  $1 \times 10^{-2}$  eV  $\text{\AA}^{-1}$  for maximal components of force. Then, we carried out building models and simulations for three systems, including ZnO, ZnO<sub>2</sub>, and ZnO@ZnO<sub>2</sub> to study the mechanism of ORR. ZnO slab was modeled by a  $3 \times 2 \times 3$  unit cell, ZnO<sub>2</sub> slab was modeled by a  $2 \times 2 \times 3$  unit cell, and the ZnO@ZnO<sub>2</sub> slab was derived from ZnO, which was added 6 O atoms placed on the surface among Zn atoms. And a vacuum thickness was set to 20  $\text{\AA}$  for these systems to remove any interactions between periodic slabs. First, optimize the intermediates during ORR. The atoms in the last layer were fixed on the three systems, and all the other atoms were relaxed. The applied voltage was corrected according to Computational Hydrogen Electrode (CHE) model proposed by Norskov et al<sup>10,11</sup>. In CHE, the Gibbs free energy of the proton-electron pairs ( $\text{H}^+ + \text{e}^-$ ) is set to one-half of the Gibbs free energy of a hydrogen ( $\text{H}_2$ ) molecule,  $\Delta G(U)$  was corrected with an applied potential  $U$  can be defined as:

$$\Delta G(U) = \Delta G(0) - eU$$

Where the  $-eU$  term is the multiplication of electron charge and the applied potential ( $U$ ).

Free energies were calculated as follows:

$$G_{298.15} = E_{elec} + E_{zpe} - T * S_m^v$$

The vibrational frequencies were evaluated for only surface adsorbate and calculated. According to

the results of the calculated frequency, we obtained the zero-point energy(zpe) that corrected the  $E_{elec}$  and absorption entropy  $S_m^V$

$$S_m^V = \sum_{\tilde{\nu}} R \left\{ \frac{\beta h c \tilde{\nu}}{e^{\beta h c \tilde{\nu}}} - \ln(1 - e^{-\beta h c \tilde{\nu}}) \right\}$$

Where  $R$  is gas constant,  $\beta$  is  $1/T \cdot K_b$  ( $K_b$  is Boltzman constant),  $h$  is Plank constant,  $c$  is light speed, and  $\nu$  is wave number.

All potential possibilities of oxygen molecules adsorbed on the ZnO@ZnO<sub>2</sub> interface are explored, and Fig. S13 shows the simulation diagram of adsorption configurations of oxygen molecules at different sites. The results show that the oxygen adsorption configuration shown in Fig. S10 F has the lowest potential energy, i.e. the reaction site is the Zn atoms at the heterogeneous interface.

The formation energy of OOH\* to O\* on ZnO@ZnO<sub>2</sub> is higher than ZnO. Meanwhile, the formation energy of OOH\* to \*H<sub>2</sub>O<sub>2</sub> (\* denotes an unoccupied active site) on ZnO@ZnO<sub>2</sub> is smaller than that of ZnO and ZnO<sub>2</sub>. The binding energy of HOO\* ( $\Delta G_{HOO^*}$ ) was an effective activity descriptor with an optimal value of ~4.2 eV. According to this guideline, the  $\Delta G_{HOO^*}$  of ZnO@ZnO<sub>2</sub> ( $\Delta G_{HOO^*} = 3.54$  eV) is closer to the optimal value than ZnO ( $\Delta G_{HOO^*} = 2.37$  eV) and ZnO<sub>2</sub> ( $\Delta G_{HOO^*} = 2.54$  eV). Since the OOH\* adsorption is present on both the 2e<sup>-</sup> and 4e<sup>-</sup> pathways, it is not the only factor affecting selectivity, as a weaker O\* adsorption will effectively inhibit the conversion of OOH\* to O\* to obtain higher H<sub>2</sub>O<sub>2</sub> selectivity. The dashed line in Fig. 2I represents the average value between the absorbed energy on Pt (classic 4e<sup>-</sup> ORR catalyst;  $\Delta G_{O^*} = 1.58$  eV) and on PtHg<sub>4</sub> (classic 2e<sup>-</sup> ORR catalyst;  $\Delta G_{O^*} = 2.75$  eV), which is a boundary ( $\Delta G_{O^*} = 2.165$  eV)<sup>12,13</sup>. The binding energy of O\* on ZnO@ZnO<sub>2</sub> ( $\Delta G_{O^*} = 2.92$  eV), albeit not as positive as PtHg<sub>4</sub>, has exceeded the boundary and was sufficiently large to render 2e<sup>-</sup> ORR.

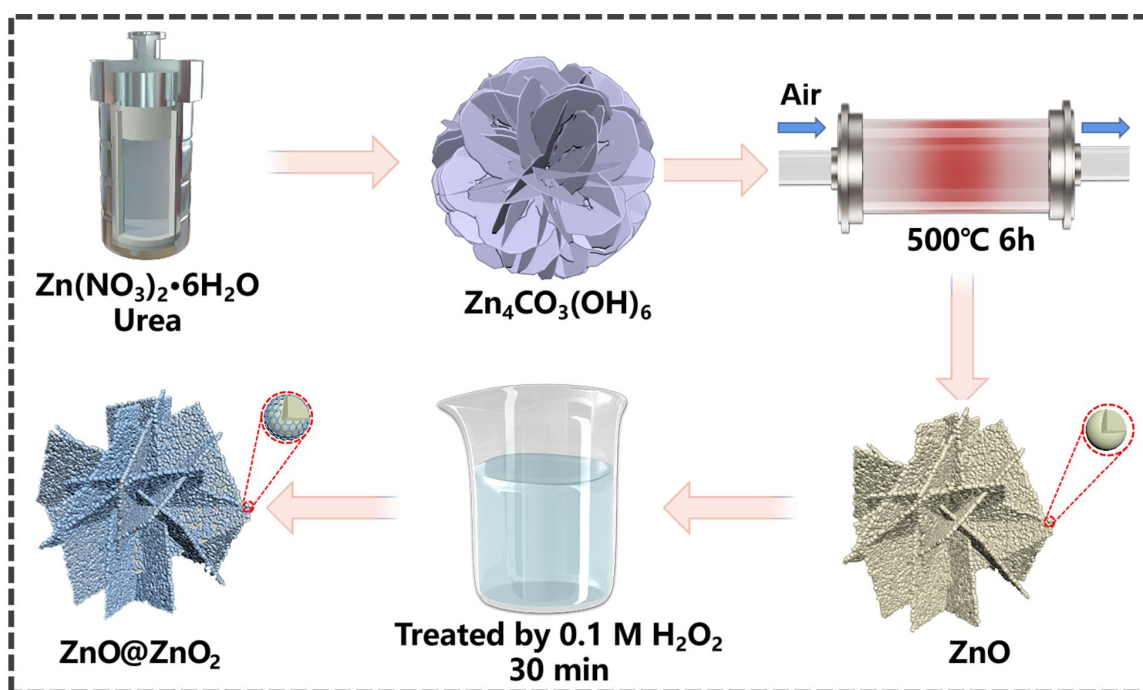

**Fig. S1** Schematic illustration for the synthesis of ZnO@ZnO<sub>2</sub>.

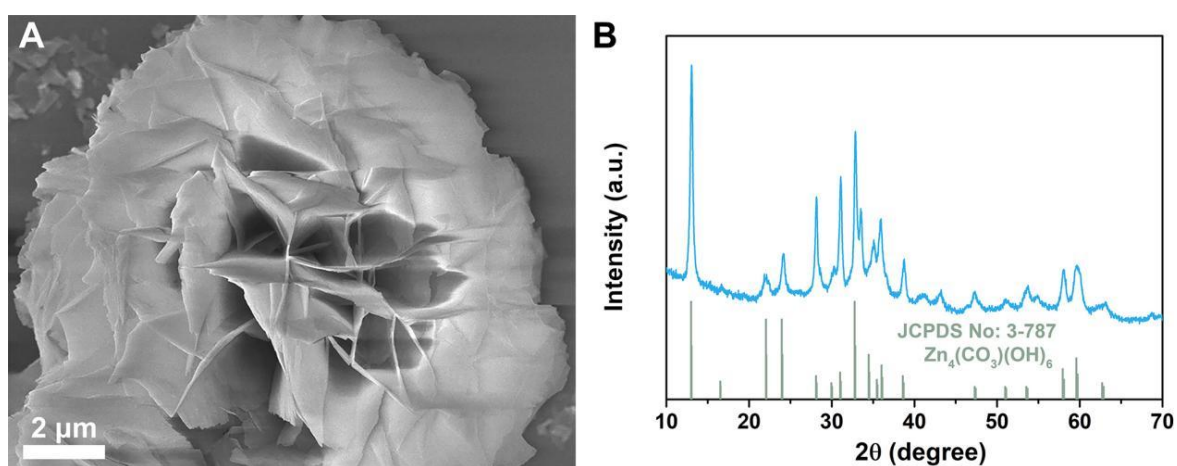

**Fig. S2** (A) SEM image and (B) XRD pattern and standard card (JCPDS NO: 3-787) of  $\text{Zn}_4\text{CO}_3(\text{OH})_6$ . The product obtained in the first step is flake nanostructure, which is shown to be  $\text{Zn}_4\text{CO}_3(\text{OH})_6$  by XRD.

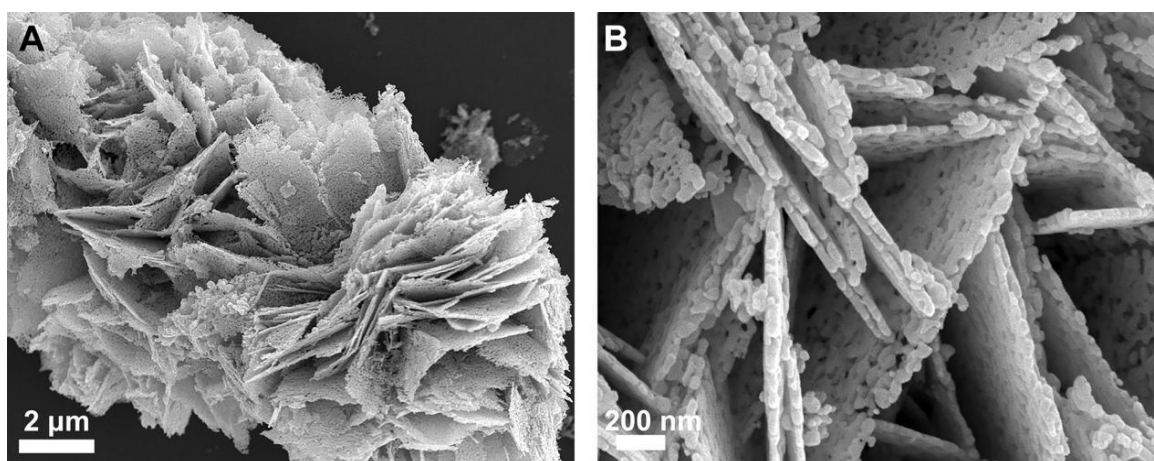

**Fig. S3** SEM images of ZnO.

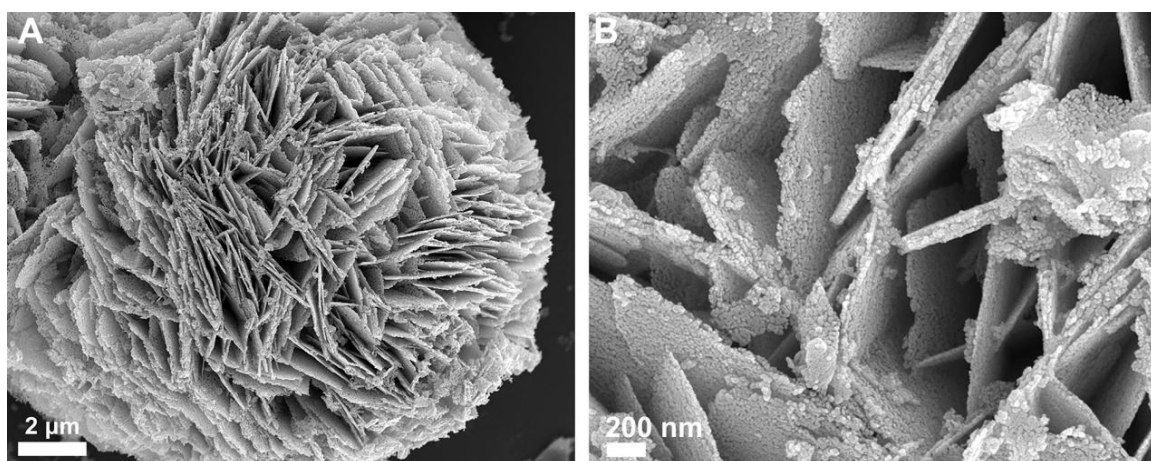

**Fig. S4** SEM images of ZnO@ZnO<sub>2</sub>.



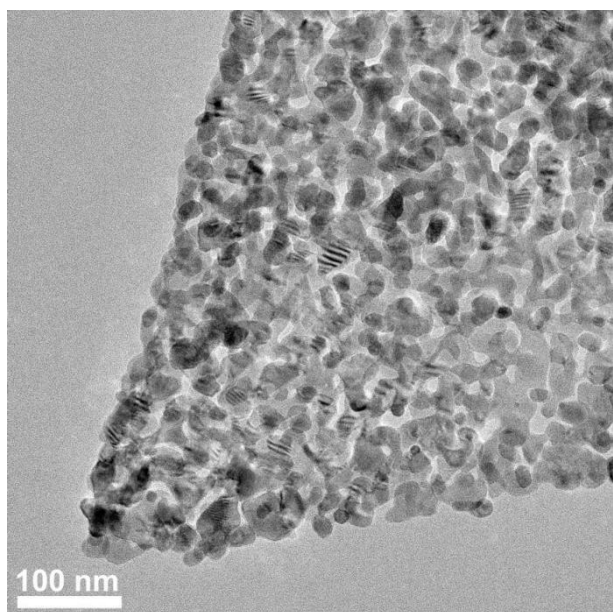

**Fig. S5** TEM image of ZnO.

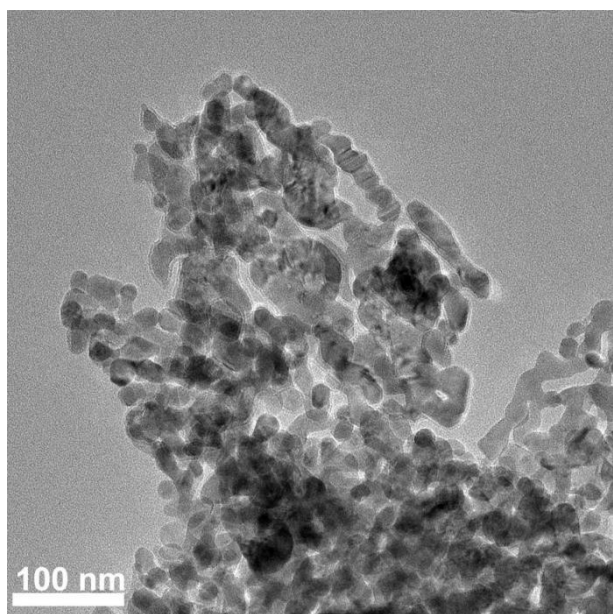

**Fig. S6** TEM image of ZnO@ZnO<sub>2</sub>.

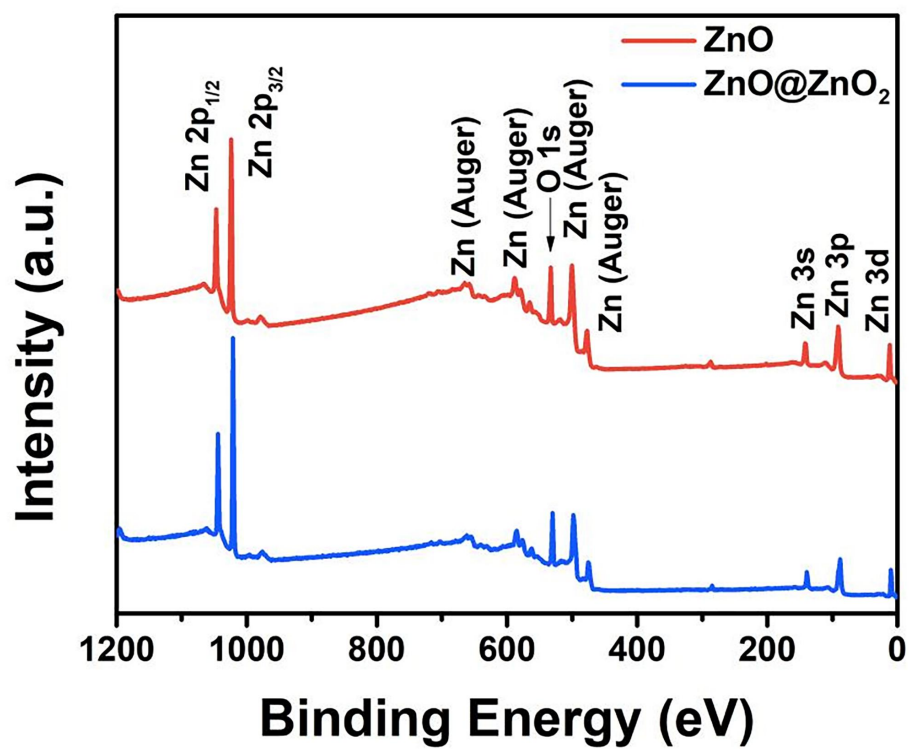

Fig. S7 XPS survey spectra of ZnO and ZnO@ZnO<sub>2</sub>.

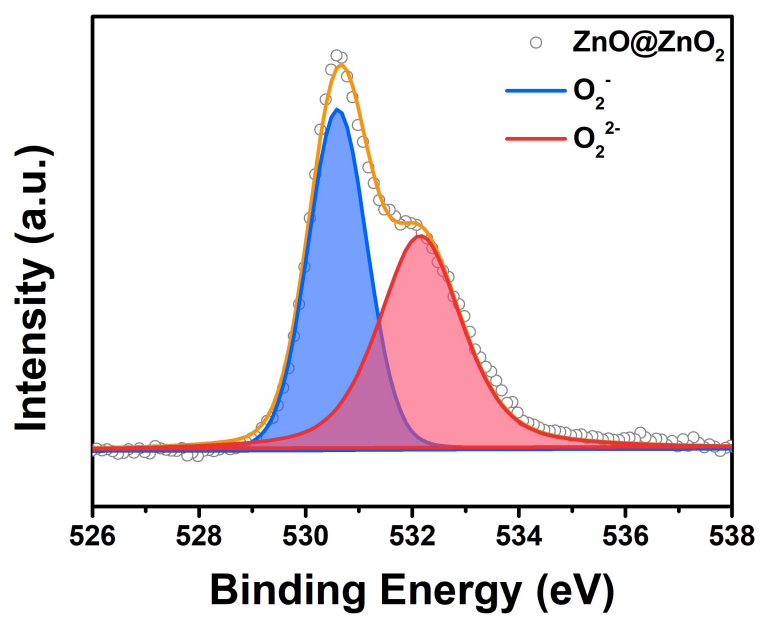

Fig. S8 Fitted peaks of O 1s spectrum of ZnO@ZnO<sub>2</sub>.

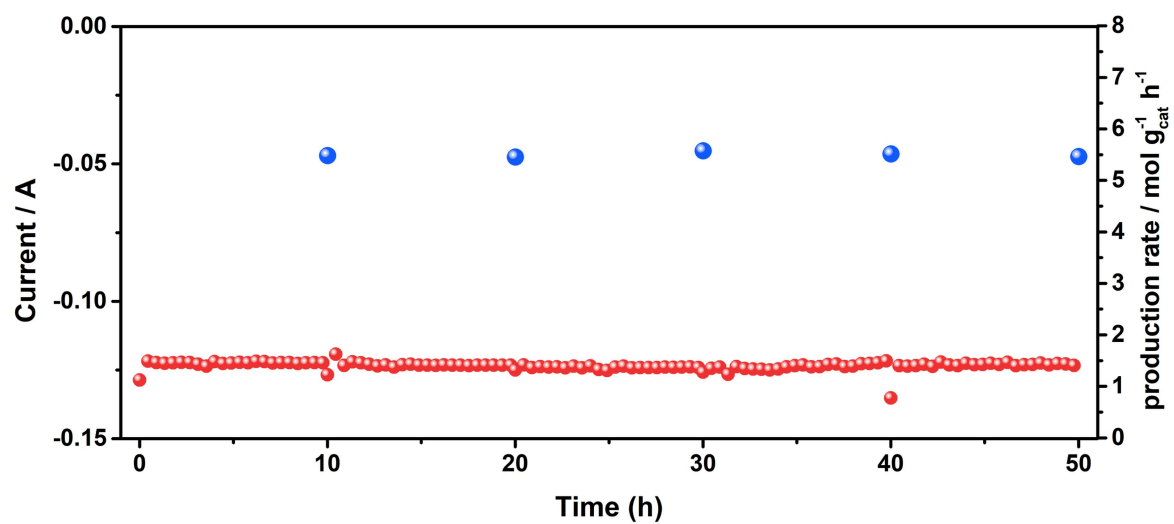

**Fig. S9** I - t curves and H<sub>2</sub>O<sub>2</sub> production rate of ZnO@ZnO<sub>2</sub> @ 0.1 V vs. RHE. The electrolyte solution is renewed every 10 hours.

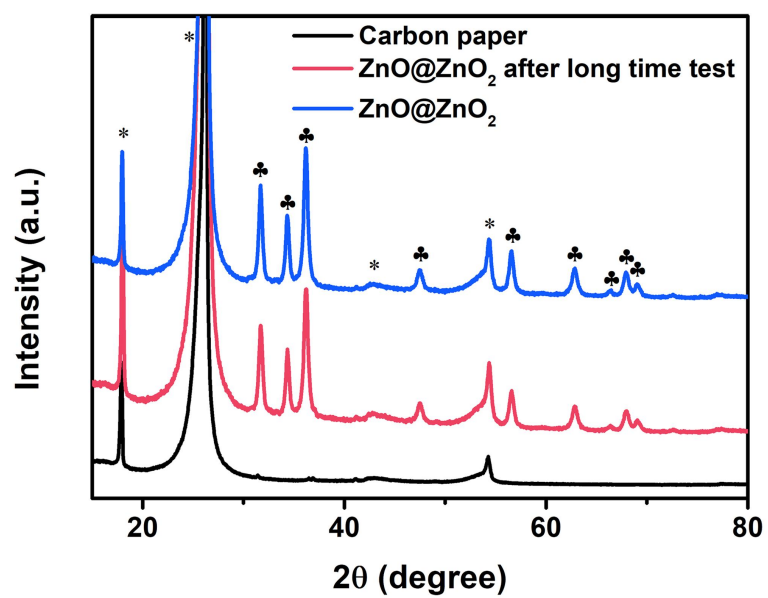

**Fig. S10** XRD patterns of carbon paper, ZnO@ZnO<sub>2</sub> loaded on carbon paper before and after long time test.

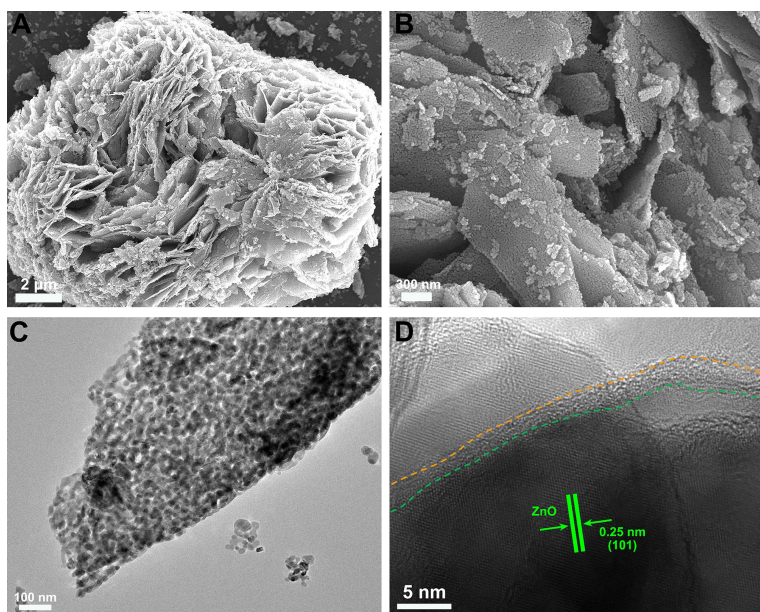

**Fig. S11** (A, B) SEM image of ZnO@ZnO<sub>2</sub> after long-term cycles. (C, D) TEM and HRTEM images of ZnO@ZnO<sub>2</sub> after long-term cycles.

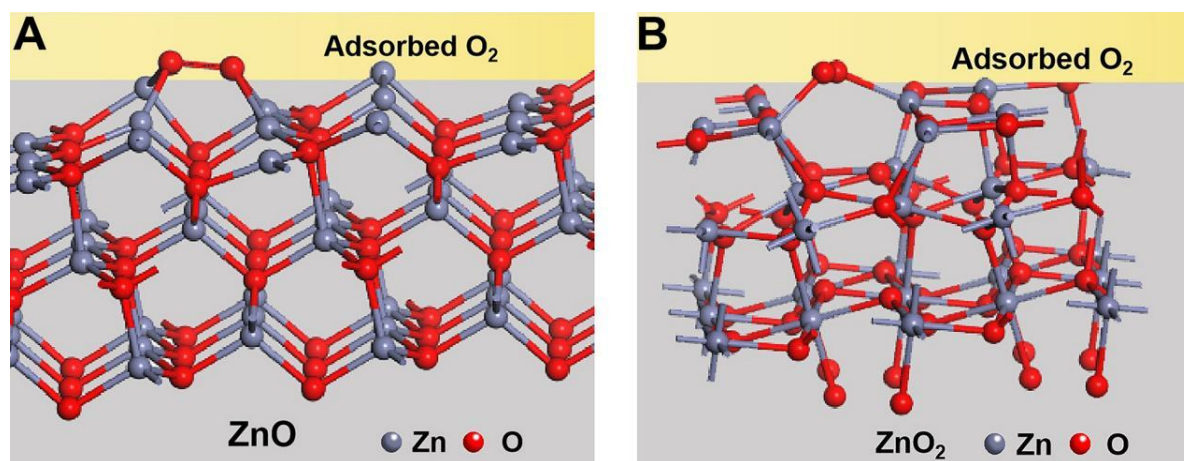

**Fig. S12** Adsorption model of  $O_2$  molecule on  $ZnO$  and  $ZnO_2$ ; red and gray spheres represent O and Zn atoms, respectively.



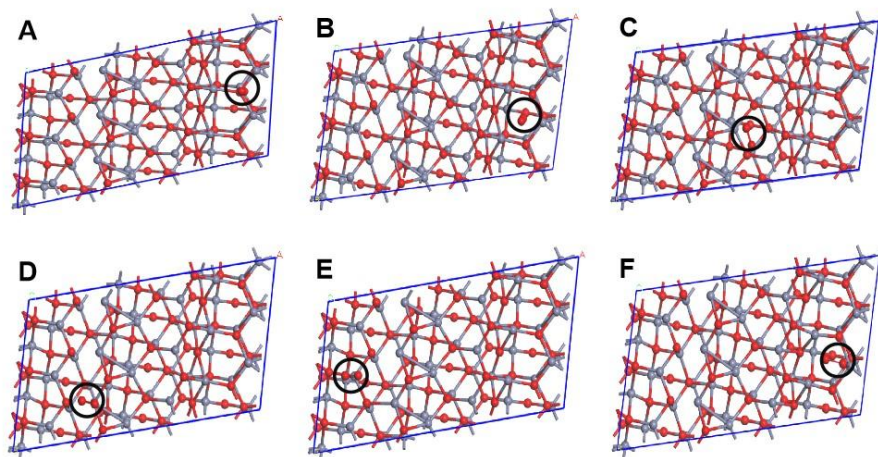

**Fig. S13** TOP view of adsorption configuration of oxygen molecules at different sites of ZnO@ZnO<sub>2</sub>. (A) Top site on O (-511.237 eV), (B) Hollow site (-511.280 eV), (C) Bridge site I (-511.287 eV), (D) Bridge site II (-511.241 eV), (E) Top site on Zn I (-511.458 eV), (F) Top site on Zn II (-511.581 eV).

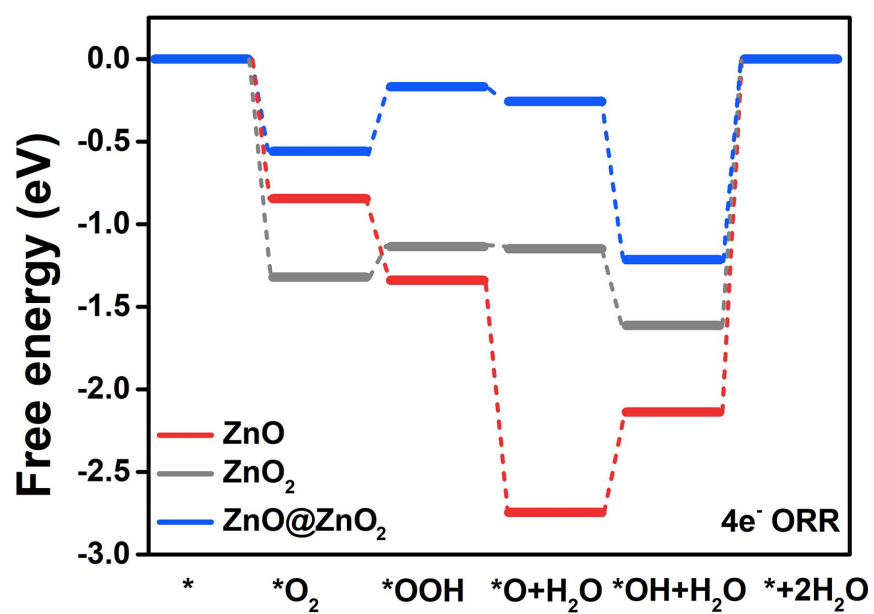

Fig. S14 4e<sup>-</sup> ORR pathway on ZnO, ZnO<sub>2</sub> and ZnO@ZnO<sub>2</sub> ( $U$ : 0.7 V).

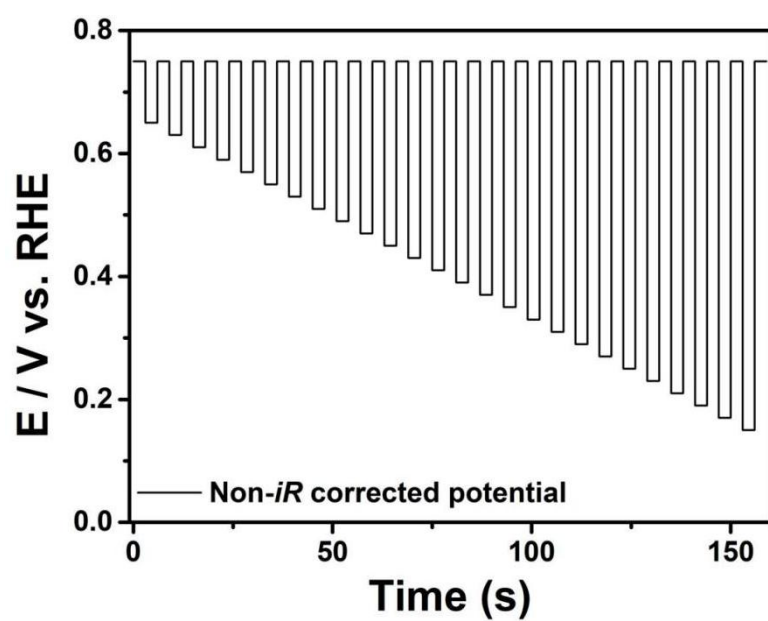

**Fig. S15** Pulse voltammetry protocol between 0.75 V vs. RHE anodic and 0.65 V to 0.15 V vs. RHE cathodic non- $iR$  corrected potentials.

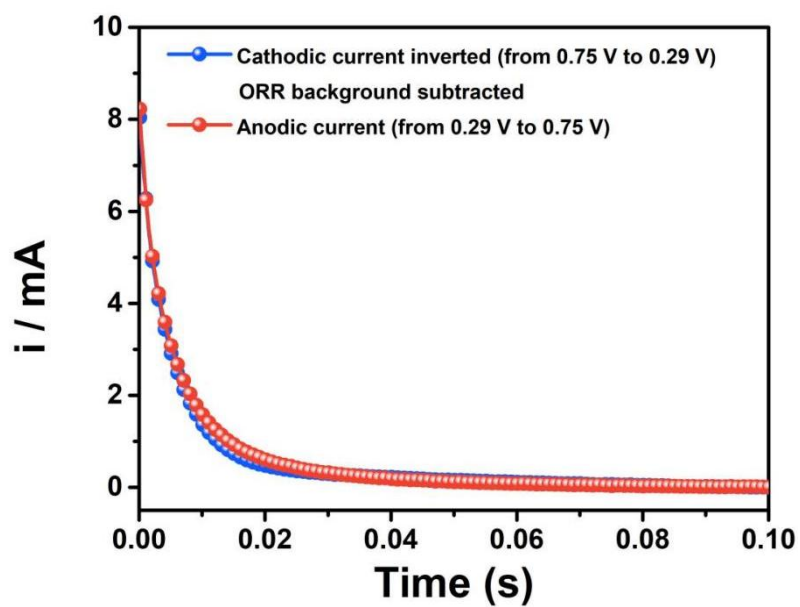

**Fig. S16** Inverted cathodic current decay after background subtraction (step from 0.75 V to 0.29 V) and the anodic current signal upon the reverse (0.29 V to 0.75 V) of ZnO@ZnO<sub>2</sub>.

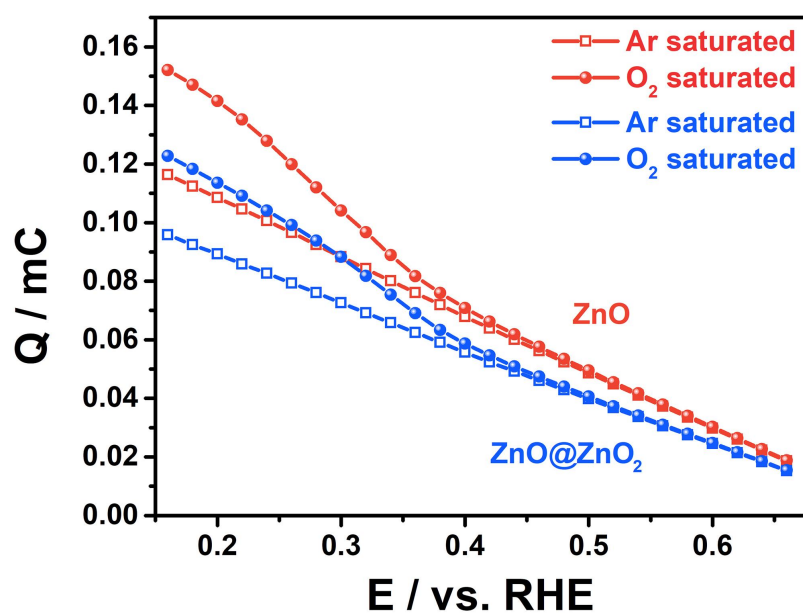

**Fig. S17** Charge versus potential from PVC of ZnO and ZnO@ZnO<sub>2</sub> in O<sub>2</sub> and Ar saturated 0.1 M K<sub>2</sub>SO<sub>4</sub>.

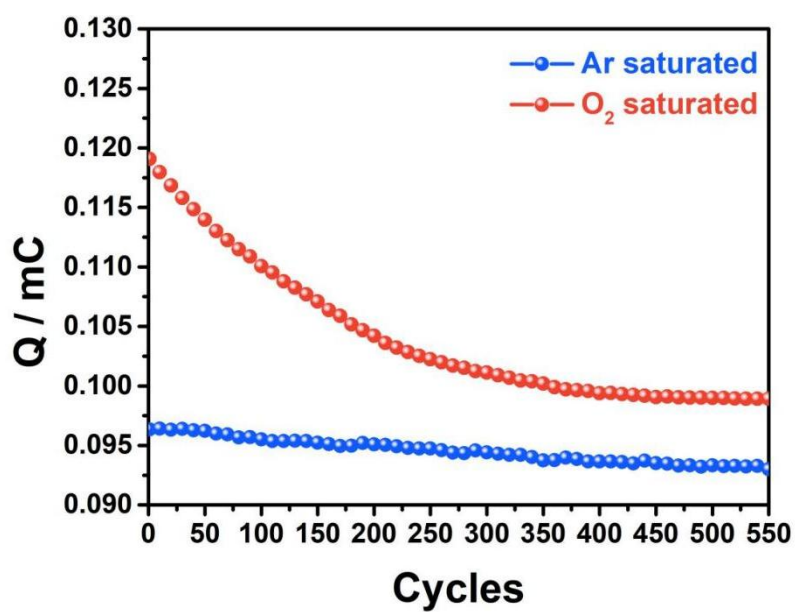

**Fig. S18** Charge of ZnO during 550 cyclic PVC in O<sub>2</sub> or Ar saturated 0.1 M K<sub>2</sub>SO<sub>4</sub>. It is calculated at intervals of 10 cycles to obtain the value of charge stored by ZnO.

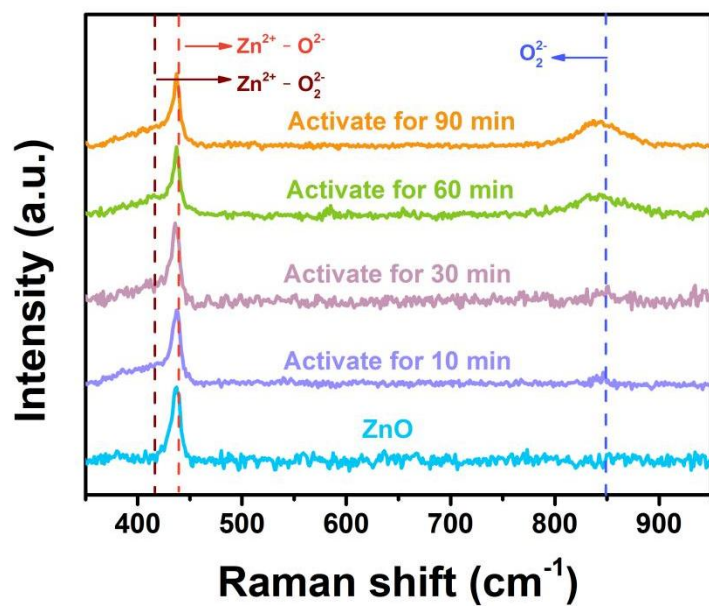

Fig. S19 Raman spectra of ZnO electrically activated for different times.

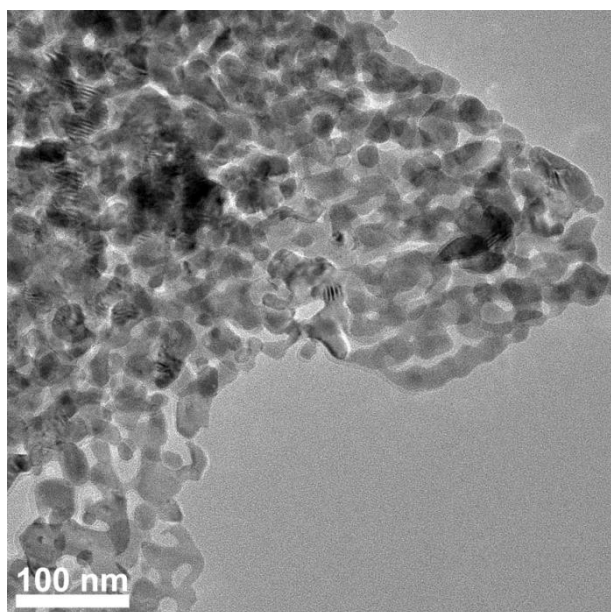

**Fig. S20** TEM image of ZnO treated by 10 mmol·L<sup>-1</sup> H<sub>2</sub>O<sub>2</sub>.



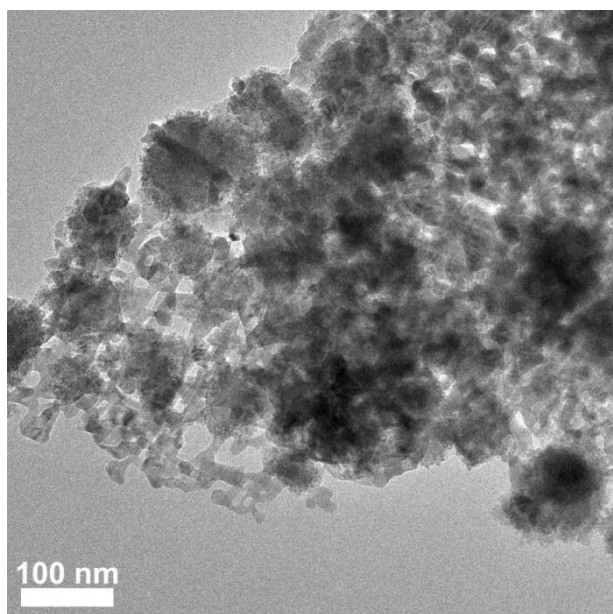

**Fig. S21** TEM image of ZnO treated by  $0.4 \text{ mol}\cdot\text{L}^{-1} \text{ H}_2\text{O}_2$ .

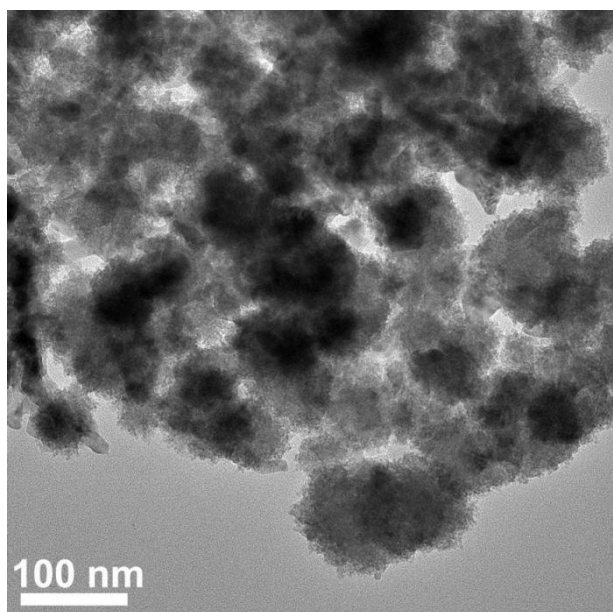

**Fig. S22** TEM image of ZnO treated by 1.6 mol·L<sup>-1</sup> H<sub>2</sub>O<sub>2</sub>.

**Table S1.** The comparison of 2e<sup>-</sup> ORR performance in neutral solution.

| Material                   | Electrolyte                              | Selectivity  | 1 mA cm <sup>-2</sup> | Onset potential | Ref.             |
|----------------------------|------------------------------------------|--------------|-----------------------|-----------------|------------------|
| <b>ZnO@ZnO<sub>2</sub></b> | <b>0.1 M K<sub>2</sub>SO<sub>4</sub></b> | <b>~100%</b> | <b>0.38</b>           | <b>0.5</b>      | <b>This work</b> |
| Co/NC                      | 0.1 M PBS                                | >90%         | 0.72                  | 0.8             | 14               |
| O-BC-3h                    | 0.1 M PBS                                | 75-80%       | 0.357                 | 0.47            | 15               |
| HPC-H24                    | 0.1 M Na <sub>2</sub> SO <sub>4</sub>    | 70.2-85.1%   | 0.47                  | 0.55            | 16               |
| PCMNS                      | 0.1 M K <sub>2</sub> SO <sub>4</sub>     | 86.7-93.3%   | 0.41                  | 0.49            | 17               |
| Pd-Se-B NC                 | 0.1M KPI                                 | 80-90%       | 0.55                  | 0.7             | 18               |
| PR-25/Silica-700           | 0.1 M K <sub>2</sub> SO <sub>4</sub>     | 80-90%       | 0.41                  | 0.5             | 19               |
| MHCS-9:1                   | 0.1M PBS                                 | >90%         | 0.51                  | 0.62            | 20               |
| N-CNT                      | 0.1M PBS                                 | 90-94.2%     | 0.38                  | 0.75            | 21               |
| CoS <sub>2</sub>           | 0.05 M Na <sub>2</sub> SO <sub>4</sub>   | <50%         | 0.5                   | 0.54            | 22               |
| Fe-CNT                     | 0.1 M PBS                                | 80-100%      | 0.41                  | 0.53            | 23               |
| GOx/MnCO <sub>3</sub>      | 3.5% NaCl                                | ~50%         | 0.4                   | 0.635           | 24               |
| O-CNT                      | 0.1M PBS                                 | 85%          | 0.32                  | 0.5             | 25               |
| PEI50CMK3_800T             | 0.1 M K <sub>2</sub> SO <sub>4</sub>     | 89.8%        | 0.32                  | 0.52            | 26               |

**Table S2.** The comparison of H<sub>2</sub>O<sub>2</sub> production rates of ZnO@ZnO<sub>2</sub> with recently reported ORR catalysts in neutral solution.

| Material             | Electrolyte                           | Condition              | Productivity<br>(mol g <sup>-1</sup> <sub>cat</sub> h <sup>-1</sup> ) | Faradaic<br>efficiency (%) | Ref.      |
|----------------------|---------------------------------------|------------------------|-----------------------------------------------------------------------|----------------------------|-----------|
| ZnO@ZnO <sub>2</sub> | 0.1 M K <sub>2</sub> SO <sub>4</sub>  | 0.1V                   | 5.47                                                                  | 95.5%                      | This work |
| Co/NC                | 0.1 M PBS                             | 0.3V                   | 3.57                                                                  | 84.2%                      | 14        |
| O-BC-3h              | 0.1 M Na <sub>2</sub> SO <sub>4</sub> | 50 mA cm <sup>-2</sup> | 1.525                                                                 | 65.4%                      | 15        |
| HPC-H24              | 0.1 M Na <sub>2</sub> SO <sub>4</sub> | 0.15V                  | 0.1102                                                                | 70.8%                      | 16        |
| PCMNS                | 0.1 M K <sub>2</sub> SO <sub>4</sub>  | 0.35V                  | 1.1025                                                                | -                          | 17        |
| PR-25/Silica-70<br>0 | 0.1 M PBS                             | 0V                     | 1.27                                                                  | >90%                       | 19        |
| N-CNT                | 0.1 M PBS                             | 0.15V                  | 4.45 mmol<br>h <sup>-1</sup> L <sup>-1</sup>                          | 89.5%                      | 21        |
| PEI50CMK3_8<br>00T   | 0.1 M K <sub>2</sub> SO <sub>4</sub>  | 0.2V                   | 0.571                                                                 | 37-65%                     | 26        |
| N-CBMC-500           | 0.5 M Na <sub>2</sub> SO <sub>4</sub> | -0.65V                 | 2.46                                                                  | 70%                        | 27        |

## Reference:

- 1 C. P. De Pauli and S. Trasatti, *J. Electroanal. Chem.*, 1995, **396**, 161–168.
- 2 S. Ardizzone, G. Fregonara and S. Trasatti, *Electrochimica Acta*, 1990, **35**, 263–267.
- 3 G. Kresse and J. Hafner, *Phys. Rev. B*, 1993, **47**, 558–561.
- 4 G. Kresse and J. Furthmüller, *Comput. Mater. Sci.*, 1996, **6**, 15–50.
- 5 G. Kresse and J. Furthmüller, *Phys. Rev. B*, 1996, **54**, 11169–11186.
- 6 J. P. Perdew, K. Burke and M. Ernzerhof, *Phys. Rev. Lett.*, 1996, **77**, 3865–3868.
- 7 S. Grimme, J. Antony, S. Ehrlich and H. Krieg, *J. Chem. Phys.*, 2010, **132**, 154104.
- 8 P. E. Blöchl, *Phys. Rev. B*, 1994, **50**, 17953–17979.
- 9 G. Kresse and D. Joubert, *Phys. Rev. B*, 1999, **59**, 1758–1775.
- 10 J. Durst, A. Siebel, C. Simon, F. Hasché, J. Herranz and H. A. Gasteiger, *Energy Env. Sci*, 2014, **7**, 2255–2260.
- 11 G. T. K. K. Gunasooriya and J. K. Nørskov, *ACS Energy Lett.*, 2020, **5**, 3778–3787.
- 12 S. Siahrostami, A. Verdaguer-Casadevall, M. Karamad, D. Deiana, P. Malacrida, B. Wickman, M. Escudero-Escribano, E. A. Paoli, R. Frydendal, T. W. Hansen, I. Chorkendorff, I. E. L. Stephens and J. Rossmeisl, *Nat. Mater.*, 2013, **12**, 1137–1143.
- 13 X. Zhao, Y. Wang, Y. Da, X. Wang, T. Wang, M. Xu, X. He, W. Zhou, Y. Li, J. N. Coleman and Y. Li, *Natl. Sci. Rev.*, 2020, **7**, 1360–1366.
- 14 H. Shen, N. Qiu, L. Yang, X. Guo, K. Zhang, T. Thomas, S. Du, Q. Zheng, J. P. Attfield, Y. Zhu and M. Yang, *Small*, 2022, **18**, 2200730.
- 15 S. Wang, D. Ye, H. Liu, X. Zhu, Z. Liu, R. Chen, Q. Liao and Y. Yang, *Int. J. Hydrog. Energy*, 2022, **47**, 5961–5973.
- 16 Y. Liu, X. Quan, X. Fan, H. Wang and S. Chen, *Angew. Chem. Int. Ed.*, 2015, **54**, 6837–6841.
- 17 R. Hu, Y. Cui, B. Huang and L. Guan, *ACS Appl. Mater. Interfaces*, 2021, **13**, 35856–35864.
- 18 J. Lee, S. W. Choi, S. Back, H. Jang and Y. J. Sa, *Appl. Catal. B Environ.*, 2022, **309**, 121265.
- 19 B. Huang, Y. Cui, R. Hu, J. Huang and L. Guan, *ACS Appl. Energy Mater.*, 2021, **4**,

4620–4629.

20 Y. Pang, K. Wang, H. Xie, Y. Sun, M.-M. Titirici and G.-L. Chai, *ACS Catal.*, 2020, **10**, 7434–7442.

21 S. Ren, W. Cui, L. Li and Z. Yi, *Sustain. Energy Fuels*, 2021, **5**, 6310–6314.

22 H. Sheng, E. D. Hermes, X. Yang, D. Ying, A. N. Janes, W. Li, J. R. Schmidt and S. Jin, *ACS Catal.*, 2019, **9**, 8433–8442.

23 K. Jiang, S. Back, A. J. Akey, C. Xia, Y. Hu, W. Liang, D. Schaak, E. Stavitski, J. K. Nørskov, S. Siahrostami and H. Wang, *Nat. Commun.*, 2019, **10**, 3997.

24 N. Wang, S. Ma, J. Duan, X. Zhai, F. Guan, X. Wang and B. Hou, *Electrochimica Acta*, 2020, **340**, 135880.

25 Z. Lu, G. Chen, S. Siahrostami, Z. Chen, K. Liu, J. Xie, L. Liao, T. Wu, D. Lin, Y. Liu, T. F. Jaramillo, J. K. Nørskov and Y. Cui, *Nat. Catal.*, 2018, **1**, 156–162.

26 Y. Sun, S. Li, Z. P. Jovanov, D. Bernsmeier, H. Wang, B. Paul, X. Wang, S. Köhl and P. Strasser, *ChemSusChem*, 2018, **11**, 3388–3395.

27 Z. Bao, J. Zhao, S. Zhang, L. Ding, X. Peng, G. Wang, Z. Zhao, X. Zhong, Z. Yao and J. Wang, *J. Mater. Chem. A*, 2022, **10**, 4749–4757.
